# Supplementary material
Source: Research Square preprint supplement (doi:10.21203/rs.3.rs-8853038/v1)
Supplement: Supplementary file 1 [file e2c74f838b515dcd6f0b978f.docx]

A completed CONSORT checklist with page numbers stated

| Section/Topic | Item No. | Checklist item | Reported on Page No. |
| --- | --- | --- | --- |
| Title and abstract | 1a | Identification as a randomised trial in the title | Line 4-5 |
|  | 1b | Structured summary of trial design, methods, results, and conclusions | Line 42-74 |
| Introduction | 2a | Scientific background and explanation of rationale | Line 78-98 |
|  | 2b | Specific objectives or hypotheses | Line 99-103 |
| Method | | | |
| Trial design | 3a | Description of trial design(such as parallel,factorial) including allocation ratio | Line 109-138 |
| 3b | Important changes to methods after trial commencement (such as eligibility criteria), with reasons | Line 140-195 |
| Participants | 4a | Eligibility criteria for participants | Line116-129 |
| 4b | Settings and locations where the data were collected | Line109-115 |
| Interventions | 5 | The interventions for each group with sufficient details to allow replication, including how and when they were actually administered | Line 180-185 |
| Outcomes | 6a | Completely defined pre-specified primary and secondary outcome measures, including how and when they were assessed | Line219-265 |
| 6b | Any changes to trial outcomes after the trial commenced, with reasons | Line219-265 |
| Sample size | 7a | How sample size was determined | Line131-138 |
| 7b | When applicable, explanation of any interim analyses and stopping guidelines | Line131-138 |
| Randomisation | | | |
| Sequence generation | 8a | Method used to generate the random allocation sequence | Line134 |
| 8b | Type of randomisation; details of any restriction (such as blocking and block size) | Line131-138 |
| Allocation concealment | 9 | Mechanism used to implement the random allocation sequence (such as sequentially numbered containers) describing any steps taken to conceal the sequence until interventions were assigned | Line131-138 |
| Implementation | 10 | Who generated the random allocation sequence, who enrolled participants, and who assigned participants to interventions | Line138-139 |

Research protocol:

### Project summary

Over a period of more than 3 years (January 2021 to February 2024), 96 males (aged 6-35 years; average 12.3 years) who underwent circumcision were randomly divided into three groups: HC, sCC (tissue sparing), and uCC (tissue unsparing), with a follow-up period exceeding 1 year.The HC group used physiological saline containing 0.5% lidocaine for hydrodissection, while the CC group did not have a hydrodissection step. Outcome Measurements and Statistical Analysis: Primary outcomes: operation time, intraoperative bleeding, postoperative pain and wound healing time. Secondary outcomes: intraoperative pain, postoperative complications and cosmetic results. The statistical analysis of results follows the randomized case-control trial (RCT) analysis method. (**NCT Number:** NCT07056452)

### General information

### Official Title: Hydrodissection Circumcision Versus Conventional Circumcision: A Randomized Trial Evaluating Efficacy, Safety, and Patient Outcomes in Male Circumcision

### Protocol identifying number: CQJLPWCH-008

Name and address of the sponsor/funder: Chongqing Jiulongpo District Maternal and Child Health Hospital, Chongqing, Chongqing, China 632000

Name and title of the investigator(s) who is (are) responsible for conducting the research: Wujiang Liu, Professor, Deparment of Urology, Peking University First Hospital, Beijing, China 100034

### Rationale & background information

Circumcision, one of the oldest surgical procedures, is performed for medical indications such as phimosis, recurrent infections, and cultural or religious practices[1]. Despite its widespread use, conventional techniques, including the dorsal slit, sleeve resection and device-based methods (e.g., Gomco clamp, Plastibell), are associated with challenges such as postoperative pain, bleeding, glans ischaemia and uneven cosmetic outcomes [2,3]. These limitations necessitate the exploration of innovative approaches to improve patient care.

Hydrodissection circumcision is a novel technique that utilizes a pressurized water stream to separate the foreskin from subcutaneous tissue, minimizing trauma and preserving critical structures such as blood vessels, nerves and lymphatic vessel. The initial idea for this technology came from the hint of slaughtering pigs in New Year in rural China [4]. During slaughter, in order to make the pig's body swell and facilitate scraping off the fur, a small incision is often made in the pig's foot and gas is blown in or injected using an air gun. We also tried injecting gas in the early stages, but the effect was not satisfactory. Finally, it was found that injecting physiological saline containing 0.5% lidocaine had the best effect. By injecting a solution of physiological saline containing 0.5% lidocaine along the cutting line (Fig 1B and Fig 1C), the hydrodissection technique creates a natural plane of separation[5], facilitating precise and minimally invasive skin removal. Preliminary studies about sCC suggest potential advantages[6], including reduced pain, faster recovery, and improved cosmetic results. However, the efficacy and safety of HC compared to conventional methods remain underexplored.

This trial aims to evaluate the clinical efficacy, safety, and patient satisfaction of hydrodissection circumcision compared to conventional techniques. By systematically assessing outcomes such as the operative time, intraoperative bleeding, postoperative pain, recovery time and cosmetic results [7-9], this study seeks to establish hydrodissection as a viable alternative for male circumcision.

### References

1. Wilkinson GB. Circumcision: one of the oldest known surgical procedures. Urol Nurs 1997; 17(3): 125-6.

2. Schifano N, Capogrosso P, Villano A, Baldini S, Antonini G, Deho' F. Glans ischaemia after circumcision in adult males: A two-patient case series and a narrative review of the literature. Urologia 2024; 91(4): 852-60.

3. Ibiyeye TT, Taiwo JO, Nasir AA, Popoola AA. Wound Healing and Cosmetic Outcomes in Neonatal Circumcision Using Three Different Techniques. Afr J Paediatr Surg 2024; 21(4): 223-7.

4. Liu Y, Ou C, Li Y, Zhang L, He J. Regularity of rural settlement changes driven by rapid urbanization in North China over the three decades. Sci Bull (Beijing) 2023 ; 68(18): 2115-24.

5. Yang SS, Chen SC, Liu SP, Hsieh JT. Hydrodissection technique to preserve the thin distal urethra when correcting chordee without hypospadias. J Urol 2002; 168(5): 2189-91.

6. Jiang ZL, Sun CW, Sun J, Shi GF, Li H. Subcutaneous tissue-sparing dorsal slit with new marking technique: A novel circumcision method. Medicine 2019; 98: e15322.

7. Kılıç S. Comparative analysis of two methods in circumcision: a new disposable device versus classic sleeve technique. BMC Urol 2024; 24(1): 126.

8. Azizoglu M, Risteski T, Klyuev S. Alisklamp versus Conventional Dorsal Slit Circumcision: A Multicentric Randomized Controlled Trial. J Clin Med 2024; 13(15): 4568.

9. Lv BD, Zhang SG, Zhu XW, et al. Disposable circumcision suture device: clinical effect and patient satisfaction. Asian J Androl 2014; 16(3): 453-6.
